# Supplementary material
Source: MDPI journal article supplement (https://www.mdpi.com/1999-4907/8/2/41)
Supplement: s1 [file s1]

**Supplementary Materials: Using Macronutrient Distributions within Trees to Define a Branch Diameter Threshold for Biomass Harvest in Sugar Maple-Dominated Stands**

Samuel Royer-Tardif, Sylvain Delagrange, Philippe Nolet and David Rivest

Data Validation

Biomass

At the scale of the whole tree, total biomass that was measured in this study falls within the confidence interval for biomass predicted from species-specific equations calculating dry biomass as a function of tree DBH and height (Figure S1).


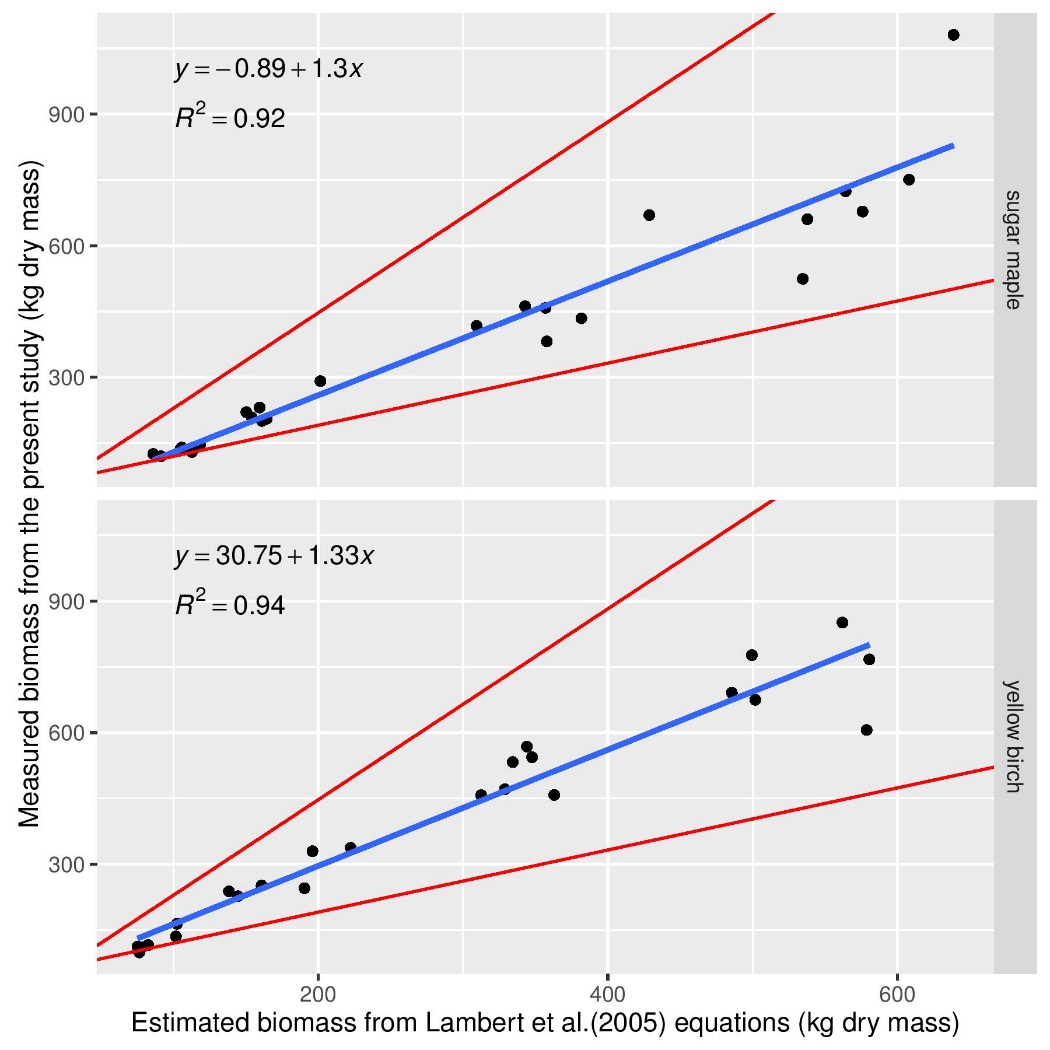


**Figure S1.** Linear regression (blue line) between total tree biomass that was measured in this study and biomass estimated using equations based on tree DBH and height [20] *. The equation for this regression and the coefficient of determination are provided for both tree species. Red lines represent the variation in this relationship when coefficient standard errors are subtracted (**upper line**) or added (**lower line**) to coefficients in the computation.

**Table S1.** Comparison of nutrient concentrations reported in this study with those provided in Paré et al. [8] for sugar maple and yellow birch stem wood, bark, and branches. Mean nutrient concentration (% on a dry-mass basis) and standard deviation are provided for N, P, K, Ca, and Mg.

Nutrient Concentrations

When treating branches as a whole, nutrient concentrations measured in the present study are close to those reported by Paré et al. [8] for all nutrients, except N (Table S1). This last nutrient was always in greater concentrations than those reported by this review, sometimes exceeding four times the reported concentrations.


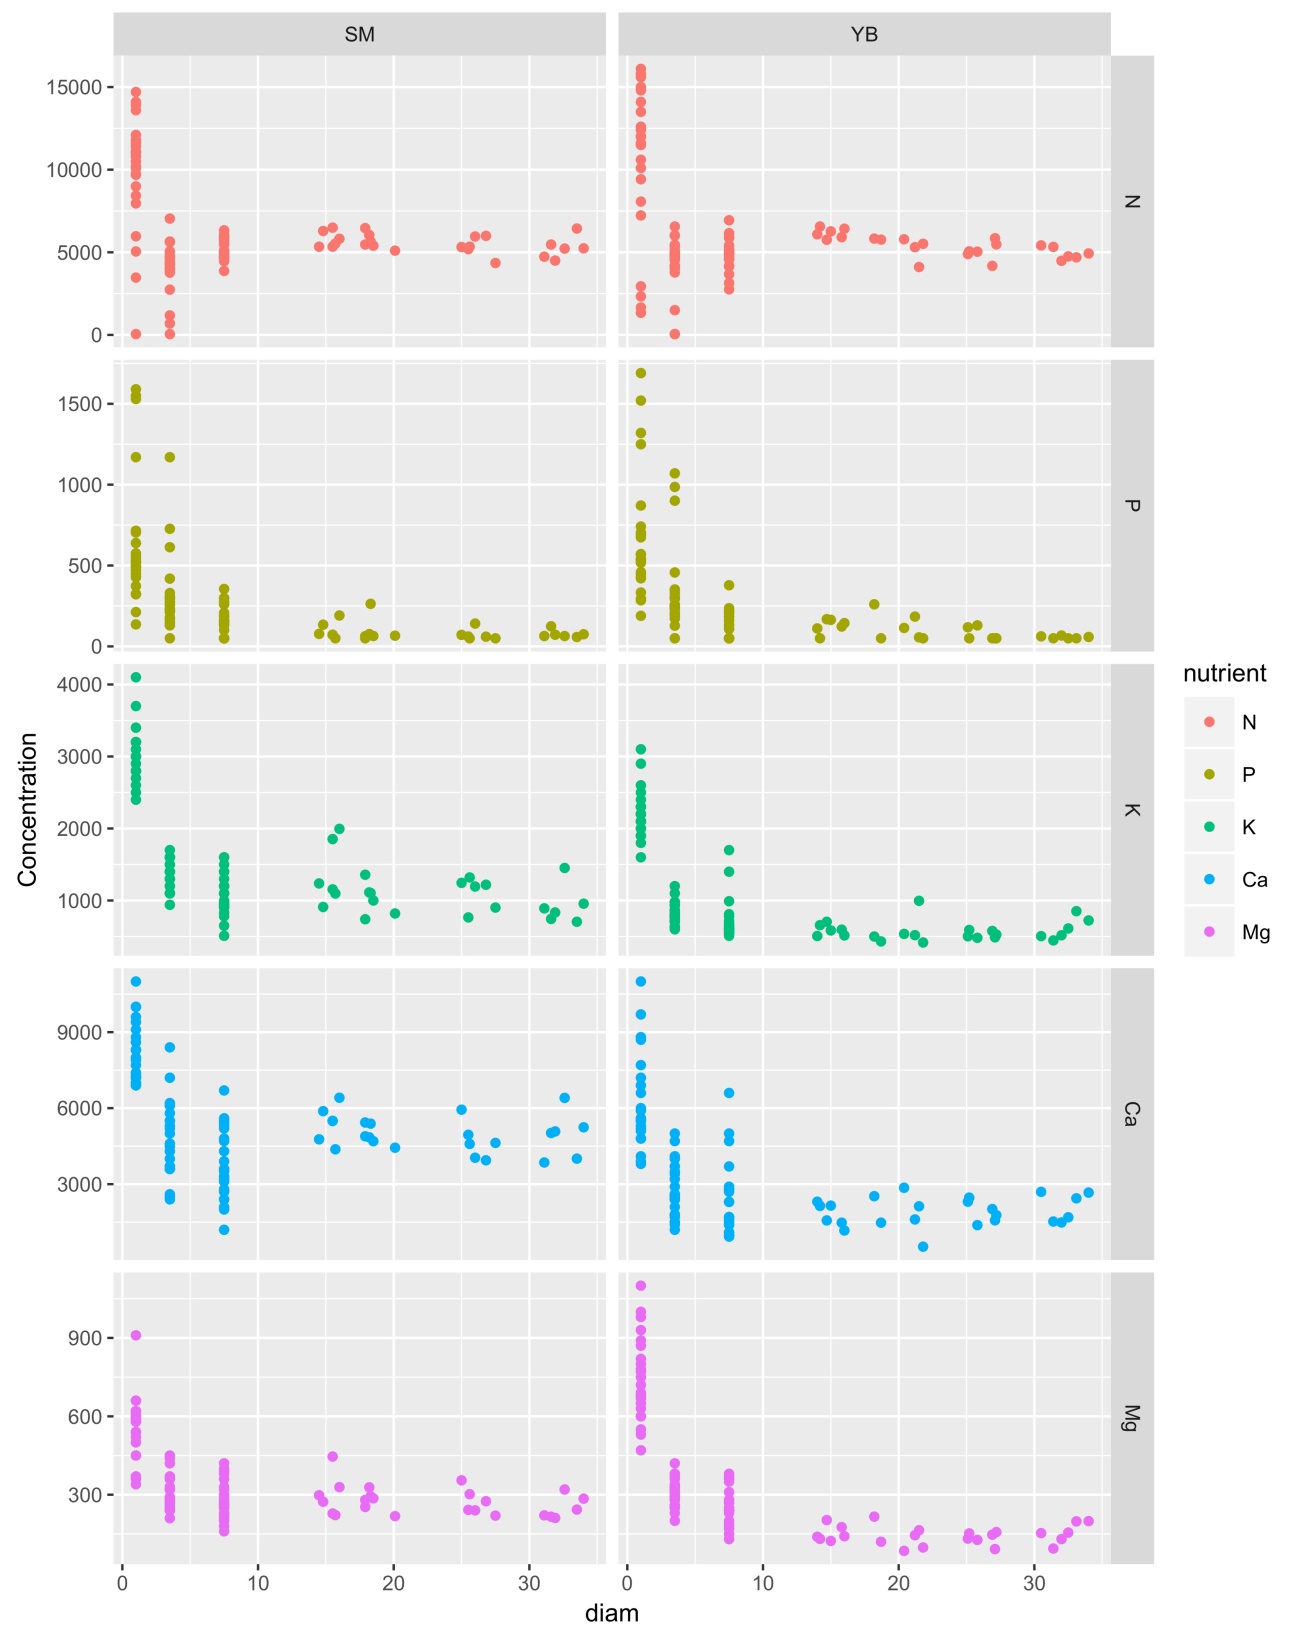


**Figure S2.** Graphical presentation of the concentrations of the five nutrients used in this study as a function of branch and stem diameter. For branch classes, the average diameter of the class was used for the graphical output. Nutrients concentrations are in ppm. SM: sugar maple, YB: yellow birch, diam: diameter in cm.

According to Yang et al. [14], nutrient concentrations in tree tissues, especially bark and branches, may be highly variable through space and time. As a result, these authors reported N concentrations in SM and YB bark and branches that were similar to those measured in the present study, but for the year 2012 only (i.e., 0.76%–1.08% in bark and 0.67%–0.68% in branches). In contrast, N concentrations measured in 1985 were more similar to those reported by Paré et al.[8] (0.57%–0.55% in bark and 0.32%–0.46% in branches). It is possible that the high N concentrations we report in our study were related to spatial or temporal variations in the concentrations of this nutrient. In order to determine whether this variation could have altered the cumulative N proportions in branch compartments and, therefore, our identification of a branch diameter threshold, we used data that were provided by Yanai [25], Paré et al. [8], and Vadeboncoeur et al. [29] to calculate the cumulative N proportions in small branches as the % of N exported with WTH, divided by that occurring with SOH. These proportions were respectively 220%, 170%, and 180% and comparable to the 171% ± 37% reported in the present study (average of values for the whole tree in the Figure 1 of the text).

**Table S2.** Mixed model summary for each branch compartment. The first row describes the fixed and random structure of the selected model. The fixed parameter estimates and standard errors (SEs) are presented along with degrees-of-freedom (DF), and *t*- and *p*-values. Note that estimates and SEs were computed from log-transformed data. Significance level was set at 0.05. The standard deviation of the random intercept and model residuals are also provided. The correlation between observations from the same tree (*n* = 6) is also provided.

| **Medium Branches** |  |  |  |  |  |
| --- | --- | --- | --- | --- | --- |
| Model: log(y) = nutrient + DBH + sp + nutrient:DBH + nutrient:sp, random = ~1|tree ID | | | | | |
| **Parameter** | **Estimate (log)** | **SE (log)** | ***DF*** | ***t*-Value** | ***p*-Value** |
| (Intercept) | 5.0966 | 0.0626 | 225 | 81.37 | 0.0000 |
| nutrient_Ca | −0.1263 | 0.0440 | 225 | −2.87 | 0.0045 |
| nutrient_K | −0.0244 | 0.0452 | 225 | −0.54 | 0.5899 |
| nutrient_Mg | −0.0468 | 0.0355 | 225 | −1.32 | 0.1895 |
| nutrient_N | −0.0568 | 0.0360 | 225 | −1.58 | 0.1162 |
| nutrient_P | 0.0882 | 0.1808 | 225 | 0.49 | 0.6262 |
| DBH | −0.0084 | 0.0025 | 45 | −3.36 | 0.0016 |
| sp_YB | 0.0704 | 0.0334 | 45 | 2.11 | 0.0404 |
| nutrient_Ca:DBH | 0.0042 | 0.0018 | 225 | 2.30 | 0.0222 |
| nutrient_K:DBH | 0.0034 | 0.0018 | 225 | 1.86 | 0.0644 |
| nutrient_Mg:DBH | 0.0036 | 0.0015 | 225 | 2.45 | 0.0149 |
| nutrient_N:DBH | 0.0015 | 0.0015 | 225 | 1.05 | 0.2933 |
| nutrient_P:DBH | 0.0142 | 0.0071 | 225 | 1.99 | 0.0475 |
| nutrient_Ca:sp_YB | 0.1221 | 0.0324 | 225 | 3.76 | 0.0002 |
| nutrient_K:sp_YB | 0.0616 | 0.0252 | 225 | 2.45 | 0.0151 |
| nutrient_Mg:sp_YB | 0.2353 | 0.0283 | 225 | 8.30 | 0.0000 |
| nutrient_N:sp_YB | −0.0179 | 0.0203 | 225 | −0.88 | 0.3783 |
| nutrient_P:sp_YB | 0.0173 | 0.0963 | 225 | 0.18 | 0.8577 |
| *Random effect* | *Intercept* | *Residuals* |  | *Within tree correlation* | |
| Standard deviation | 0.111 | 0.030 |  | 0.932 |  |

| **Small Branches** |  |  |  |  |  |
| --- | --- | --- | --- | --- | --- |
| Model: log(y) = nutrient + DBH + sp + nutrient:sp, random = ~1|tree ID | | | | |  |
| **Parameter** | **Estimate (log)** | **SE (log)** | ***DF*** | ***t*-Value** | ***p*-Value** |
| (Intercept) | 5.2650 | 0.0756 | 230 | 69.64 | 0.0000 |
| nutrient_Ca | 0.0356 | 0.0130 | 230 | 2.73 | 0.0069 |
| nutrient_K | 0.1948 | 0.0202 | 230 | 9.64 | 0.0000 |
| nutrient_Mg | 0.1222 | 0.0157 | 230 | 7.78 | 0.0000 |
| nutrient_N | 0.0506 | 0.0179 | 230 | 2.83 | 0.0051 |
| nutrient_P | 0.7471 | 0.0997 | 230 | 7.50 | 0.0000 |
| DBH | −0.0120 | 0.0030 | 45 | −3.96 | 0.0003 |
| sp_YB | 0.1243 | 0.0409 | 45 | 3.04 | 0.0039 |
| nutrient_Ca:sp_YB | 0.3181 | 0.0463 | 230 | 6.87 | 0.0000 |
| nutrient_K:sp_YB | 0.2130 | 0.0364 | 230 | 5.85 | 0.0000 |
| nutrient_Mg:sp_YB | 0.4918 | 0.0432 | 230 | 11.37 | 0.0000 |
| nutrient_N:sp_YB | 0.0299 | 0.0316 | 230 | 0.94 | 0.3464 |
| nutrient_P:sp_YB | 0.1469 | 0.1433 | 230 | 1.02 | 0.3066 |
| *Random effect* | *Intercept* | *Residuals* |  | *Within tree correlation* | |
| Standard deviation | 0.136 | 0.037 |  | 0.931 |  |

**Table S3.** Tree aboveground biomass and nutrient contents for different tolerant hardwood forests in eastern North America. Values are kg·ha−1 except for the cumulative proportion (CP) that is expressed as a percentage. This last value corresponds to the cumulative proportion of small branches relative to the stem as reported in the text and it was computed here as (WTH export/SOH export) *100. When available, data from stem-only harvesting (SOH) and whole-tree harvesting (WTH) are provided. Harvest removal ratios are presented as the ratio of biomass or nutrients exported from WTH, divided by that of SOH.

| **Site** | **Vegetation** | **Stand Age** | **Soils** | **Harvest Type** | **Biomass** | **N** | **P** | **K** | **Ca** | **Mg** | **Reference** |
| --- | --- | --- | --- | --- | --- | --- | --- | --- | --- | --- | --- |
| Hubbard Brook W5, NH | *Acer saccharum, Betula alleghaniensis, Fagus grandifolia* | 70 year | Spodosol | No harvest | 199,000 | 509 | 52 | 219 | 584 | 54 | [25] b |
| SOH a | 139,300 | 204 | 16 | 155 | 400 | 33 |
| WTH a | 195,020 | 448 | 44 | 186 | 561 | 53 |
| CP (%) | 140 | 220 | 280 | 120 | 140 | 160 |
| Lake Clair, Quebec | *Acer saccharum, Betula alleghaniensis, Fagus grandifolia* | 110 year | Podzol | No harvest | 284,000 | - | - | 355 | 819 | 95 | [26] b |
| SOH a | 182,000 | - | - | 189 | 487 | 52 |
| WTH a | 239,000 | - | - | 288 | 728 | 77 |
| CP (%) | 130 | - | - | 150 | 150 | 150 |
| 15 deciduous forest stands in New Hampshire | *Acer saccharum, Fagus grandifolia, Betula alleghaniensis,* | Different ages: 14 to >120 yeat | Typic Haplorthods | SOH a | - | 222 | 17 | 99 | 296 | 26 | [29] |
| WTH a | - | 395 | 28 | 189 | 456 | 40 |
| CP (%) | - | 180 | 160 | 190 | 150 | 150 |
| Modelling from allometric equationsc | *Acer saccharum, Betula alleghaniensis* | DBH from  12–40 cm | N/A | SOH d | 38,680 | 63 | 5 | 39 | 108 | 9 | [8] |
| WTH d | 49,934 | 108 | 14 | 94 | 166 | 17 |
| CP (%) | 130 | 170 | 300 | 240 | 150 | 180 |
| Haliburton forest, ON | *Acer saccharum, Fagus grandifolia, Tsuga canadensis* | Mature, Undefined | Podzol & Brunisol | SOH4 | 80,000 | 270 | 6 | 190 | 340 | 70 | [35] |

a Clear-cuts; b Biomass and nutrient removal with harvest are calculated from biomass and nutrient contents of different tree parts (excluding foliage) provided in the references; c Modelling the same stand composition as in the present study, but using allometric equations provided in the reference; d Selective cutting (~33% of the basal area).

**Table S4.** Comparison of average nutrient export estimated in this study with nutrient budgets and labile pools provided in the literature for similar sugar maple-dominated stands in northeastern North America. Sustainable harvest rotations and nutrient depletions were estimated, based on nutrient export with harvest averaged over stand compositions and tree marking procedures. SOH = stem-only harvesting, SLH = stem + large branches harvesting, SLMH = stem + large and medium branch harvesting, and WTH = whole-tree harvesting.

|  | **Harvesting Intensity** | **Lake Clair a** | | | | | **Haliburton Forest b** | | | | |
| --- | --- | --- | --- | --- | --- | --- | --- | --- | --- | --- | --- |
|  | **N** | **P c** | **K** | **Ca** | **Mg** | **N** | **P** | **K** | **Ca** | **Mg** |
| Annual budget (kg·ha−1 y−1) |  | 9.71 | 0.02 | 3.58 | 6.38 | 0.77 | 6.51 | 0.10 | 0.99 | 0.54 | 0.92 |
| Labile pool d (kg·ha−1) |  | - | 155.9 | 581 | 1333 | 159 | - | - | 534 | 1459 | 155 |
| Sustainable harvest rotations (years) | SOH | 26 | 185 | 12 | 31 | 14 | 39 | 37 | 43 | 371 | 12 |
| SLH | 30 | 235 | 14 | 36 | 18 | 45 | 47 | 52 | 430 | 15 |
| SLMH | 34 | 370 | 17 | 42 | 21 | 51 | 74 | 62 | 496 | 18 |
| WTH | 40 | 535 | 21 | 48 | 25 | 60 | 107 | 77 | 571 | 21 |
| Nutrient depletion with 25 years partial harvest rotations (kg·ha−1) | SOH | 9 | 3 | 0 | 41 | 0 | 89 | 1 | 18 | 187 | 0 |
| SLH | 53 | 4 | 0 | 73 | 0 | 133 | 2 | 26 | 219 | 0 |
| SLMH | 87 | 7 | 0 | 108 | 0 | 167 | 5 | 36 | 254 | 0 |
| WTH | 145 | 10 | 0 | 149 | 0 | 225 | 8 | 51 | 295 | 0 |
| Nutrient depletion as the % of labile pool | SOH | - | 2 | 0 | 3 | 0 | - | - | 3 | 13 | 0 |
| SLH | - | 3 | 0 | 5 | 0 | - | - | 5 | 15 | 0 |
| SLMH | - | 4 | 0 | 8 | 0 | - | - | 7 | 17 | 0 |
| WTH | - | 7 | 0 | 11 | 0 | - | - | 10 | 20 | 0 |

a N, P, K, Ca and Mg nutrient budgets are provided in Ouimet and Duchesne [34]. b Nutrient budgets are provided in Phillips and Watmough [35]. c P budget and labile pools are provided in Yanai [25].
d Lake Clair labile pools are from Tremblay et al. [26]. For Haliburton Forest, labile pools are from Watmough and Dillon [30].
